# Supplementary material
Source: PubMed Central journal article supplement (PMC4054219)
Supplement: AEM.00916-14_zam999105458so1.pdf [file AEM.00916-14_zam999105458so1.pdf]

## Supporting Information

### SI Figure 1

**Plate clearing assay for active mutants.** Colonies of *E. coli* expressing random mutants of TrzN were stabbed onto agar plates containing 0.9 g/L atrazine. When examined on a light box, translucent regions were visible around colonies with active protein.

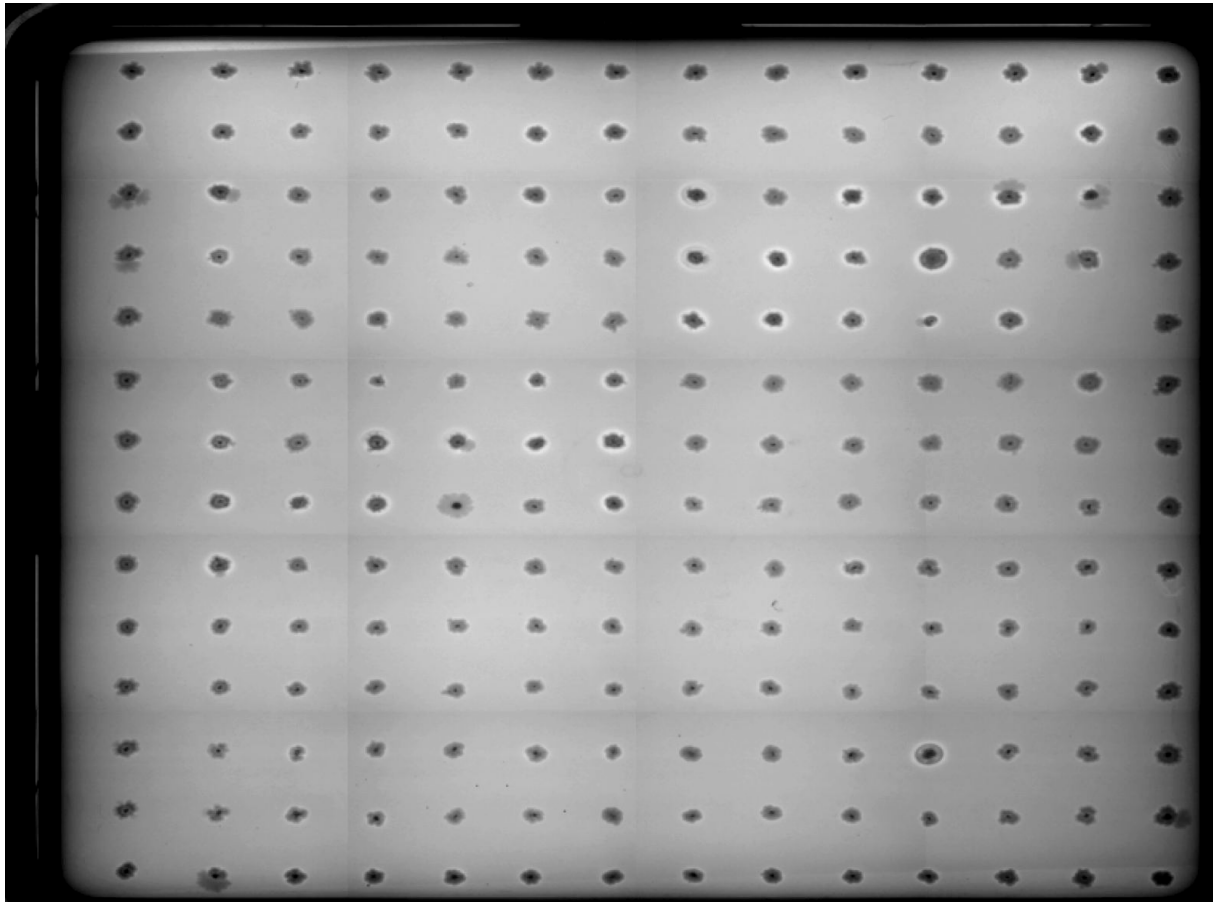

**SI Figure 2**

**The effects of mutations on soluble (1-4) and insoluble (5-8) TrzN expression.**

Wild-type TrzN and mutants were expressed at 28 °C in TB medium with 1  $\mu$ M IPTG for 24 hours. The level of both soluble and insoluble expression increases from TrzNWT (1, 5) to TrzNG1 (A159V; 2, 6), TrzNG2 (A159V/L131P; 3, 7) and TrzNG3 (A159V/L131P/D38N; 4, 8).

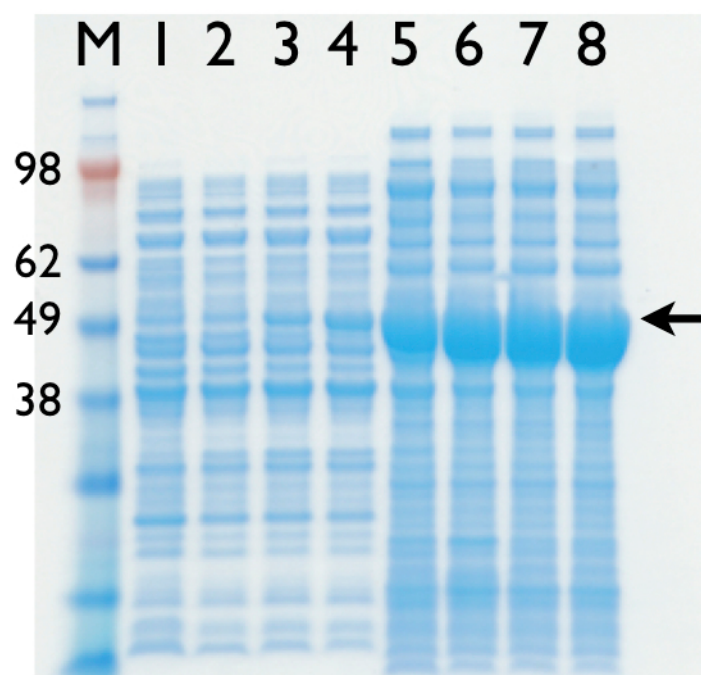

### SI Figure 3

**Reducing soluble expression of TrzNWt over time.** Wild-type TrzN (left) and TrzNG3 (right) were induced with 1M IPTG and samples were taken at 4, 6, 8 and 24 hours. Insoluble and soluble fractions were analysed by SDS-PAGE. The relative expression of TrzNWT decreases over time, whereas TrzNG3 accumulates.

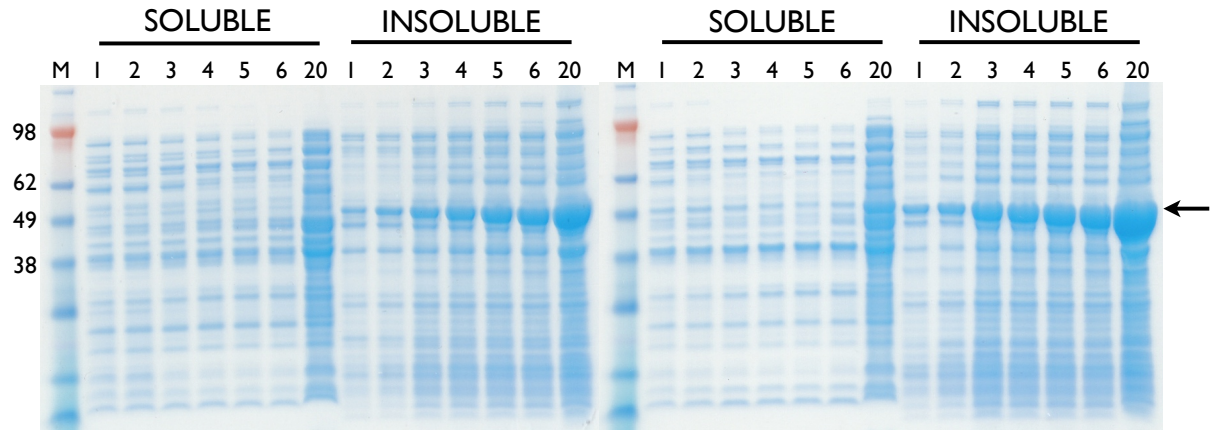

#### SI Figure 4

**The effects of chaperones on TrzN expression in *E. coli*.** Wild-type TrzN was co-expressed with and without various chaperones (pG-KJE8 = groES, groEL, dnaK, dnaJ, grpE; pGro7 = groES, groEL). There is no increase in soluble expression as a result of chaperone overexpression.

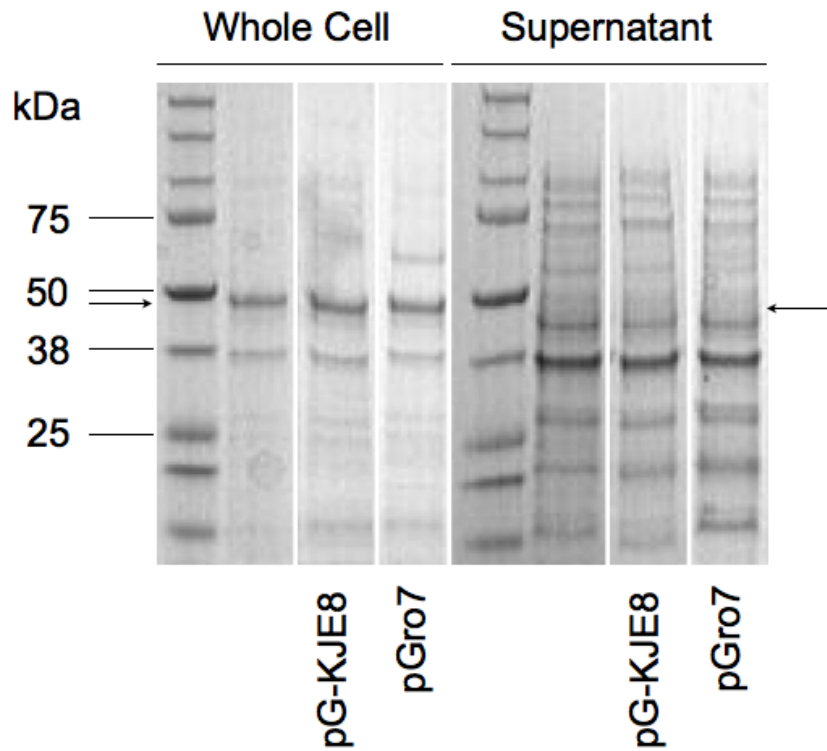

## SI Fig 5

**Metal saturation of TrzN.** Apo-TrzNG3 was incubated with varying amounts of  $\text{Zn}^{2+}$  in storage buffer, before atrazine dechlorinase activity was assayed. The mid-point of the curve was calculated to be 49  $\mu\text{M}$ .

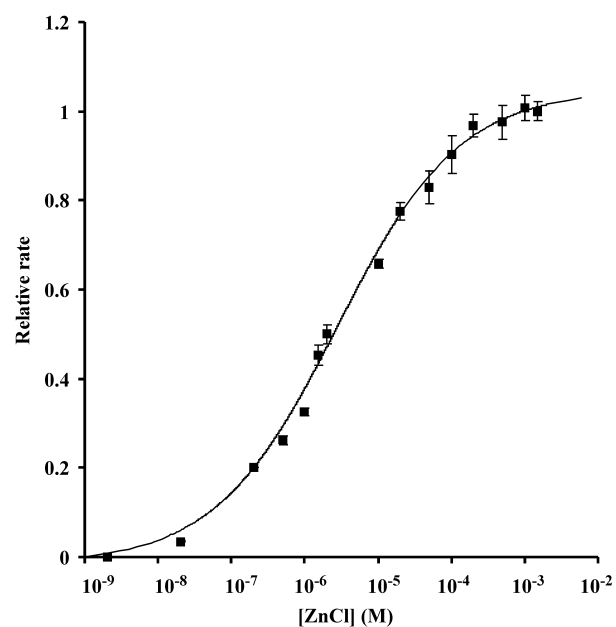

## SI Fig 6

**Circular dichroism spectroscopy of Apo-TrzNG3 and Holo-TrzNG3.** The samples were heated from 20 °C to 80 °C at a rate of 1 °C per minute. Readings were taken at 220 nm every 0.1 °C increase in temperature. The temperature at which apo-TrzNG3 was 50% unfolded was  $60.03\text{ °C} \pm 0.1\text{ °C}$  (R-value = 0.997). The temperature at which holo-TrzNG3 was 50% unfolded was  $63.53\text{ °C} \pm 0.16\text{ °C}$  (R-value = 0.991).

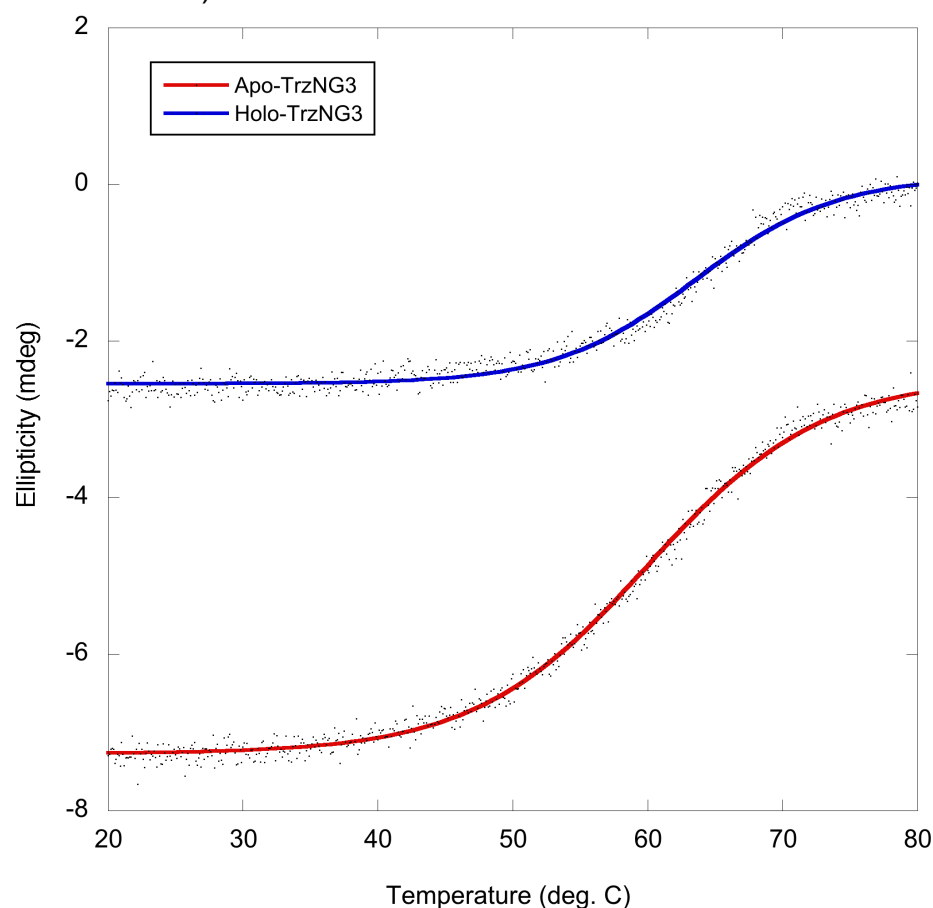

SI Fig 7

**Anomalous Map of Apo-TrzNG3.** The active site of subunit B and surrounding area is shown, overlaid with an anomalous difference map calculated from data collected above the Zn-K edge ( $1.2398 \text{ \AA}$ ,  $f' = 3.635 \text{ e}^-$ ) to maximise anomalous scattering. As can be seen from the map, contoured at  $2.5 \sigma$  and  $4 \sigma$  (no density was present at  $5 \sigma$ ), there is no density at the metal ion binding site significantly above background, confirming there was only trace amounts of metal in the crystal structure.

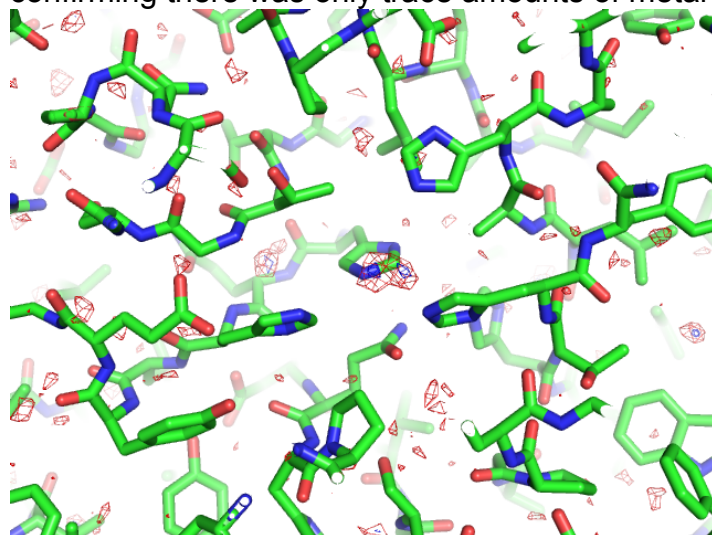

## SI Fig 8

**Stabilization of Apo-PTE by the K185R mutation.** The structure of Apo-PTE is shown (1PTA; a)<sup>39</sup>, demonstrating that K185 on the surface of the protein interacts only loosely with its surrounding residues and a water molecule. In comparison, the K185R mutation (43ET; b)<sup>40</sup> results in two new salt bridges being formed and the surface water being displaced, consistent with a large stabilizing effect. However this is not correctly predicted by FoldX (c), where the new salt bridges are not accurately modelled.

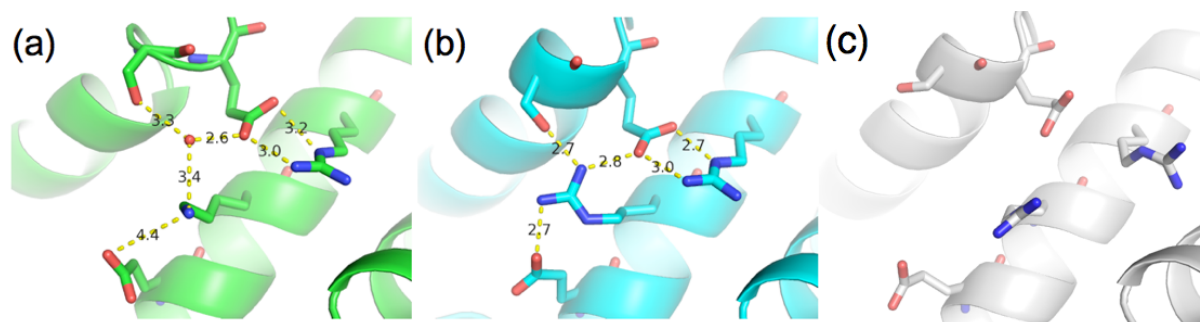

**SI Table 1. Oligonucleotides.**

| Primer | Function                              | Sequence (5'-3')                         |
|--------|---------------------------------------|------------------------------------------|
| TrzNF  | Amplification of codon optimised TrzN | AACCAACCACATATGATTCTGATCCGTGGTCTG        |
| TrzNR  | Amplification of codon optimised TrzN | GTTGGATCCTATCATTACAGATTTTTCGGAATCAGGGCCG |
| N38DF  | D38N reversion                        | GTCGCTGTGGGTAAAGATTTAAGCGATCGTAGC        |
| N38DR  | D38N reversion                        | GCTACGATCGCTTAAATCTTTACCCACAGCGAC        |
| P131LF | L131P reversion                       | GTCGCCGATCAGCATCTGTTTTTCCAGGTGCA         |
| P131LR | L131P reversion                       | TGCACCTGGAAAAAACAGATGCTGATCGGCGAC        |
| V159AF | A159V reversion                       | ATTGCTTCCATGCCGCGCGCAGCAGCATGACTCTG      |
| V159AR | A159V reversion                       | CAGAGTCATGCTGCTGCGCGCGCATGGAAGCGAAT      |

**SI Table 2. Computational estimation of the effect of the A159V mutation on TrzN stability**

| State | TrzN-MD<br>$\Delta\Delta G$ (kcal/mol) |
|-------|----------------------------------------|
| apo   | -4.29 (0.64)                           |
| holo  | -0.43 (1.08)                           |

Stability free energies (kcal/mol) for the reference state (a model of the unfolded state), apo protein and the Zn bound complex. Column 1 contains the MD-simulated free energies for changing alanine 159 into valine in apo-TrzN and holo-TrzN. The stability free energy difference of the A159V mutation can be written as  $\Delta\Delta G = \Delta G_{\text{prot}} - \Delta G_{\text{ref}}$ . A negative  $\Delta\Delta G$  means the mutant is more stable. Error bars from the MD simulation are in parentheses.

**SI Table 3. Computational estimation of the effects of mutations on apo-PTE and holo-PTE using FoldX**

|       | holo-PTE     | apo-PTE      |
|-------|--------------|--------------|
| K77E  | <b>-1.46</b> | <b>-1.16</b> |
| A80V  | -0.60        | <b>-1.44</b> |
| R111S | 0.04         | 0.14         |
| K185R | -0.06        | 0.72         |
| A204G | 1.14         | -0.33        |
| D208G | 1.07         | 0.23         |
| I274S | 0.73         | 0.21         |
| R319S | 0.68         | <b>-1.52</b> |

Stability free energies ( $\Delta\Delta G$ , kcal/mol) for mutants of apo-PTE (1PTA) and holo-PTE (1HZY) as calculated using the protein design tool FoldX. A negative  $\Delta\Delta G$  means the mutant is more stable.
